# Supplementary material for: Molecular epidemiology and phylodynamic analysis of enterovirus 71 in Beijing, China, 2009–2019
Source: Springer Nature journal article supplement (doi:10.1186/s12985-023-02028-9), 2023-11-03

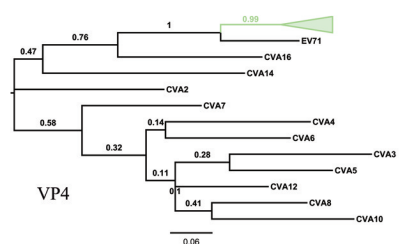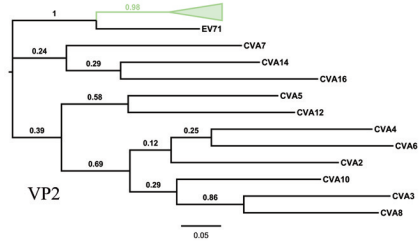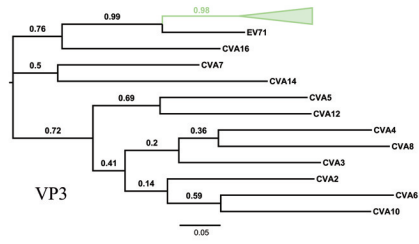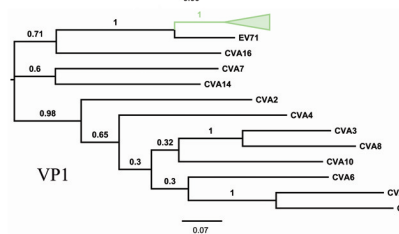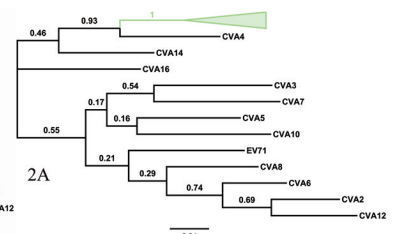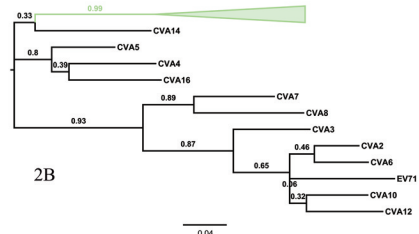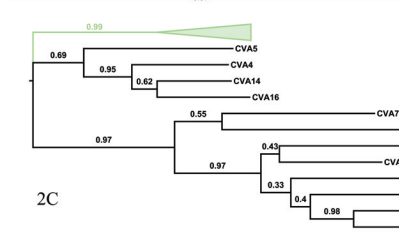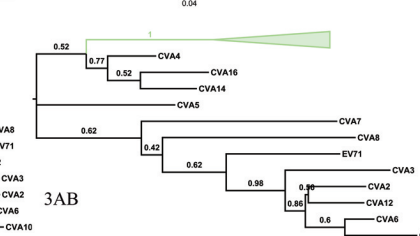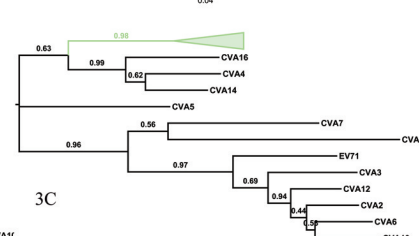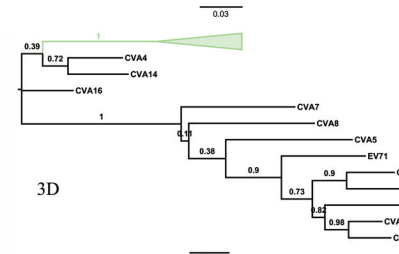

Supplement: MOESM5 [file 26261494]
